# Supplementary material for: Root architecture, rooting profiles and physiological responses of potential slope plants grown on acidic soil
Source: PeerJ. 2020 Aug 24;8:e9595. doi: 10.7717/peerj.9595 (PMC7451015; doi:10.7717/peerj.9595)
Supplement: Dataset S1 [file peerj-08-9595-s001.xlsx]

## Sheet: TRANSPIRATION
	TRANSPIRATION
	SPECIES	TREATMENT	REPLICATE	TRANSPIRATION RATE (INITIAL)	TRANSPIRATION RATE (FINAL)
	Melastoma malabathricum	T1	1	1.44624	4.76239
			2	1.61094	3.81094
			3	2.7812	2.4812
			4	2.02807	4.70701
			5	2.67512	3.96512
		T2	1	2.24954	3.75008
			2	0.235497	3.86386
			3	1.74143	5.1513
			4	0.278651	3.15651
			5	0.120968	1.55651
		T3	1	1.50081	3.24954
			2	2.66386	4.2355
			3	2.45059	4.64143
			4	0.156506	2.17865
			5	1.56506	2.12097
	Hibiscus rosa-sinensis	T1	1	0.156506	3.27651
			2	1.63723	2.77723
			3	3.11409	3.97409
			4	2.96885	3.72685
			5	2.75222	2.89622
		T2	1	2.73915	1.8624
			2	0.160916	3.24
			3	1.23895	3.57452
			4	1.254	3.13683
			5	1.138	3.264
		T3	1	0.624	2.98915
			2	0.11	2.17092
			3	2.30452	2.43895
			4	2.46683	2.544
			5	2.294	3.248
	Syzygium campanulatum	T1	1	2.339	3.139
			2	2.383	3.393
			3	2.3475	2.88975
			4	2.449	2.999
			5	2.58	3.482
		T2	1	2.228	2.17837
			2	2.105	2.591
			3	0.219	3.4165
			4	1.849	2.722
			5	2.0515	2.83233
		T3	1	2.13567	3.128
			2	1.951	2.575
			3	2.1465	2.199
			4	2.142	2.549
			5	2.06233	2.6315

## Sheet: ROOT PROFILE
	ROOT PROFILE
	PARAMETER			ROOT LENGTH	RLD	AVERAGE DIAMETER	ROOT VOLUME
	T1	MM	R1	690.7	0.0775197	2.6247	9.132
			R2	404.135	0.0453574	1.7257	9.453
			R3	587.161	0.0658991	1.4969	10.334
			R4	489.137	0.0548976	1.3612	9.67812
			R5	503.561	0.0565164	1.8126	9.2312
					0
		HR	R1	342.058	0.0383903	0.7949	1.698
			R2	313.48	0.035183	1.1105	3.036
			R3	317.664	0.0356525	1.1347	3.212
			R4	320.459	0.0359662	0.8143	1.347
			R5	332.652	0.0373347	0.9163	2.429
					0
		SC	R1	959.137	0.107647	0.5548	2.318
			R2	1625.05	0.182385	0.5948	4.515
			R3	1180.36	0.132476	0.5434	2.734
			R4	1503.34	0.168725	0.5532	4.1203
			R5	993.136	0.111463	0.5603	2.9423
					0
	T3	MM	R1	1179.49	0.132378	1.6626	25.607
			R2	1270.36	0.142576	1.2674	16.026
			R3	1369.86	0.153745	1.8213	8.682
			R4	1246.86	0.13994	1.5632	19.1126
			R5	1302.65	0.146201	1.4823	20.1743
					0
		HR	R1	891.936	0.100105	1.3759	3.262
			R2	980.256	0.110017	0.6353	3.108
			R3	1265.63	0.142046	0.5899	3.459
			R4	993.677	0.111524	0.7231	3.266
			R5	1086.03	0.121889	0.5698	3.3175
					0
		SC	R1	1664.11	0.186769	1.1968	18.72
			R2	1128.19	0.126621	1.4999	19.934
			R3	1439.55	0.161566	0.8643	8.446
			R4	1322.28	0.148404	1.344	17.4385
			R5	1485.12	0.16668	0.966	15.0352
					0
	T2	MM	R1	518.236	0.0581635	1.6575	11.182
			R2	691.559	0.077616	2.6806	8.947
			R3	790.079	0.0886733	1.2106	9.095
			R4	773.201	0.086779	1.576	10.1003
			R5	692.131	0.0776802	1.9678	11.04
					0
		HR	R1	1396.33	0.156715	0.7189	5.668
			R2	1000.53	0.112293	0.7151	4.018
			R3	987.541	0.110835	0.7278	4.109
			R4	1023.45	0.114866	0.7094	4.2166
			R5	1143.03	0.128286	0.7219	5.309
					0
		SC	R1	1017.45	0.114191	0.811	5.255
			R2	615.844	0.0691183	0.6771	2.218
			R3	1020.72	0.114559	0.8056	5.203
			R4	987.262	0.110804	0.7716	3.4104
			R5	735.226	0.0825169	0.7214	5.244

## Sheet: BIOMASS
SPECIES	TREATMENT	REPLICATE	STEM	ROOT	TOTAL BIOMASS
Melastoma malabathricum	T1	1	21.1627	11.3922	32.5549
		2	11.2627	13.4961	24.7588
		3	16.7186	11.7755	28.4941
		4	19.03	11.43	30.46
		5	14.27	13.84	28.11
	T2	1	22.2747	13.0677	35.3424
		2	12.276	15.0265	27.3025
		3	14.3352	17.3398	31.675
		4	18.89	16.68	35.57
		5	13.84	15.37	29.21
	T3	1	22.7833	24.5413	47.3246
		2	23.5965	16.4436	40.0401
		3	21.93	12.3069	34.2369
		4	23.12	20.41	43.53
		5	20.1545	14.11	34.2645
Hibiscus rosa-sinensis	T1	1	4.4307	5.7239	10.1546
		2	7.6673	6.0562	13.7235
		3	5.37	6.1289	11.4989
		4	5.65	5.76	11.41
		5	7.02	5.23	12.25
	T2	1	13.7382	9.187	22.9252
		2	8.3375	7.3155	15.653
		3	10.43	9.2633	19.6933
		4	9.73	8.47	18.2
		5	9.146	7.04	16.186
	T3	1	9.1941	9.187	18.3811
		2	15.626	7.3155	22.9415
		3	11.03	9.2633	20.2933
		4	12.65	8.33	20.98
		5	10.2891	9.62	19.9091
Syzygium campanulatum	T1	1	17.3447	7.4503	24.795
		2	14.7588	7.3658	22.1246
		3	15.3376	7.8833	23.2209
		4	16.45	7.23	23.68
		5	16.44	7.09	23.53
	T2	1	12.5371	8.3225	20.8596
		2	18.6389	7.8748	26.5137
		3	14.3324	8.6598	22.9922
		4	15.66	8.32	23.98
		5	14.72	8.56	23.28
	T3	1	12.068	11.6345	23.7025
		2	12.2286	9.0508	21.2794
		3	17.32	11.3043	28.6243
		4	17.33	9.11	26.44
		5	25.3317	10.3	35.6317

## Sheet: PLANT HEIGHT
PLANT HEIGHT
SPECIES	TREATMENT	REPLICATE	(INITIAL)	(FINAL)
Melastoma malabathricum	T1	1	46.5	61.6
		2	51.8	77.4
		3	53.2	61.9
		4	56.1	71.7
		5	44.4	68.8
	T2	1	56.8	64.7
		2	56.5	63.2
		3	42.6	50.1
		4	39.5	53.2
		5	48.4	56.8
	T3	1	49.5	53.2
		2	56.5	64.8
		3	58.1	65.3
		4	52.3	59.3
		5	58.9	63.1
Hibiscus rosa-sinensis	T1	1	20.9	29.33
		2	21	28.3
		3	20.5	30.1
		4	17.5	21.2
		5	21.5	26.3
	T2	1	30.9	46.5
		2	22.3	25.3
		3	20	26.7
		4	23.7	32.5
		5	22.1	32.5
	T3	1	20.5	29.1
		2	22.4	27.6
		3	21.1	38.4
		4	19.9	34.9
		5	16.3	50.2
Syzygium campanulatum	T1	1	35.6	39.3
		2	25.7	30.7
		3	24.4	29.8
		4	40.3	44.8
		5	33.1	55.3
	T2	1	30.8	37.5
		2	49.5	57.2
		3	35.3	42.3
		4	27.5	36.3
		5	34.2	47.2
	T3	1	39.5	43.7
		2	27.9	33.5
		3	48.9	52.5
		4	34.1	42.9
		5	45.3	55.2

## Sheet: PHOTO STOMA
PHOTOSYNTHETIC RATE
INITIAL		R1	R2	R3	R4	R5		FINAL		R1	R2	R3	R4	R5
T1	MM	13.3827	13.708	14.2458	11.497	11.7148		T1	MM	15.3827	19.708	24.2458	21.497	19.7148
T1	HR	9.91268	8.94847	13.293	10.1241	12.6475		T1	HR	10.9127	18.9485	14.293	10.5678	15.6475
T1	SC	9.77477	8.0421	11.177	9.77942	9.79357		T1	SC	11.7748	7.0421	14.177	11.7794	11.7936
T2	MM	6.28715	14.5028	10.2056	9.73864	12.3838		T2	MM	16.2871	14.8054	17.2056	19.7386	11.3838
T2	HR	4.86547	5.10133	6.33952	7.75793	11.4803		T2	HR	7.86547	3.10133	5.33952	9.75793	10.4803
T2	SC	11.556	10.0239	10.3524	10.8515	9.15441		T2	SC	13.556	14.0239	9.35241	12.8515	10.1544
T3	MM	10.6876	8.24826	10.8821	8.89474	9.07007		T3	MM	15.6876	14.2483	15.8821	8.89474	19.0701
T3	HR	11.7329	10.6948	11.3487	8.06337	5.65722		T3	HR	17.7329	13.6988	12.3487	17.0634	10.5572
T3	SC	10.552	11.0394	8.57444	9.52486	11.3296		T3	SC	13.552	10.0394	7.57444	14.5249	12.3296
STOMATAL CONDUCTANCE
INITIAL		R1	R2	R3	R4	R5				FINAL		R1	R2	R3	R4	R5
T1	SP1	0.33111	0.712404	0.895373	0.875715	0.833509				T1	MM	1.01311	2.05124	2.08954	2.08757	0.183351
T3	SP1	0.165693	0.864207	0.532551	0.176598	0.818281				T3	MM	3.18569	1.85642	3.25326	0.98766	1.00183
T2	SP1	0.419928	0.767699	0.229112	0.266266	0.143645				T2	MM	2.54199	1.57677	2.02291	0.892663	1.00144
T1	SP2	0.109837	0.47541	0.938357	0.901542	0.847992				T1	HR	2.2011	2.83554	1.89784	0.0901542	0.0847992
T3	SP2	0.845184	0.469275	0.2257	0.347485	0.16357				T3	HR	3.18452	2.84693	1.02257	2.03475	4.21636
T2	SP2	0.31425	0.5207	0.123635	0.19743	0.67308				T2	HR	1.83143	2.55207	0.912363	2.01974	0.667308
T1	SP3	0.695545	0.71816	0.673	0.71161	0.75164				T1	SC	3.06955	2.17182	0.8673	1.57116	0.655164
T3	SP3	0.641575	0.601445	0.59715	0.5633	0.624185				T3	SC	1.27416	2.07014	1.56597	3.45633	0.862418
T2	SP3	0.663053	0.61654	0.65746	0.655805	0.659853				T2	SC	3.46631	2.46165	3.06575	0.73558	0.565985

## Sheet: Al shoot
Shoot
INITIAL										ave	sd		FINAL										ave	sd
T1	MM	1422.3	1378.5	1272.3	1200.6	1372.9	1179.5	1402.2	1352.1	1322.55	93.1152		T1	MM	2065.2	2331.7	1939.2	2117.1	1981.4	2284.6	1800.4	1836.2	2044.47	194.155
T1	HR	7.9	10	8.2	7.6	6.4	11.2	12.9	14.1	9.7875	2.74301		T1	HR	13.1	17.2	11.9	10.7	9.8	9.7	8.8	10	11.4	2.71082
T1	SC	40.9	42.7	38.8	45.1	50.4	31.4	30.2	29.4	38.6125	7.65944		T1	SC	42.1	47.4	39.3	51.5	57.4	47.7	50.01	45.2	47.5763	5.63159
T2	MM	1350.7	1450.8	1865.2	1455.7	1500.1	1621.9	1280.8	1362.4	1485.95	185.283		T2	MM	2101.4	1852.3	1900.4	1928.5	1950.8	2184.7	2084.2	2231.4	2029.21	140.139
T2	HR	10	12	11.1	9.8	13.3	15.7	12.2	9.2	11.6625	2.13805		T2	HR	12.2	14.7	10.7	11.4	12.2	13	11.1	10.2	11.9375	1.4362
T2	SC	39.1	42.7	55.6	49.4	52.2	51.1	42.5	57.7	48.7875	6.6938		T2	SC	60.1	72.2	53.4	48.8	50.01	45.4	42.2	53.3	53.1762	9.41148
T3	MM	552.7	620.5	580.2	645.3	513.6	603.7	530.3	610.7	582.125	46.286		T3	MM	1350	1227.7	1100.6	1282.5	975.2	1321.2	1207.1	1182.8	1205.89	122.619
T3	HR	4.1	5.2	6.4	9.7	8.3	3.87	4.8	6	6.04625	2.04764		T3	HR	8.8	4.2	5.4	4.7	6.1	9.3	7.4	8.5	6.8	1.96832
T3	SC	40.3	50.6	35.8	70.3	55.2	47.1	32.4	42.8	46.8125	12.0946		T3	SC	50.2	48.2	40.76	53.2	39.1	45	55.8	44.2	47.0575	5.86419

## Sheet: ec
EC
INITIAL								FINAL
T1	MM	510.4	385.2	191.4	206.1	346.5		T1	MM	652	732	642	298	298
T1	HR	193.2	167.2	321	431.6	372.8		T1	HR	1286	725	1105	1700	880
T1	SC	344.2	311.5	146.2	372.3	174.1		T1	SC	350	1494	1320	706	882
T2	MM	77.69	97.29	77.23	94.06	73.53		T2	MM	297	907	297	513	255
T2	HR	183.4	187.8	207.7	127.9	137.1		T2	HR	417	382	323	240	591
T2	SC	185.4	117.2	121.3	113.3	148.2		T2	SC	309	343	201	280	822
T3	MM	57.83	34.07	42.81	47.72	63.28		T3	MM	1375	863	316	971	896
T3	HR	53.86	110.4	70.03	82.1	59.03		T3	HR	537	734	481	954	1088
T3	SC	62.46	36.81	58.79	42.15	54.93		T3	SC	285	217	330	726	760

## Sheet: pH
pH
INITIAL
									Final
T1	MM	T1MM	4.18	4.14	4.13	3.99	4.2			T1	MM	T1MM	4.58	4.09	4.02	4.35	3.97
T1	HR	T1HR	4.03	3.97	3.78	3.91	3.85			T1	HR	T1HR	3.96	3.99	3.96	3.89	3.91
T1	SC	T1SC	3.86	3.79	3.7	3.71	3.77			T1	SC	T1SC	3.88	3.93	3.94	3.83	3.87
T2	MM	T2MM	6.2	6.14	6.36	6.38	6.47			T2	MM	T2MM	6.12	6.2	6.18	6.1	6.28
T2	HR	T2HR	6.58	6.79	6.88	6.77	6.63			T2	HR	T2HR	6.3	6.39	6.47	6.63	6.39
T2	SC	T2SC	6.71	6.83	6.72	6.51	6.48			T2	SC	T2SC	6.65	6.67	6.78	6.68	6.44
T3	MM	T3MM	4.35	4.49	4.53	4.46	4.52			T3	MM	T3MM	4.66	4.17	4.23	4.17	4.16
T3	HR	T3HR	4.48	4.28	4.38	4.39	4.39			T3	HR	T3HR	4.17	4.32	4.227	4.31	4.14
T3	SC	T3SC	4.48	4.39	4.49	4.44	4.52			T3	SC	T3SC	4.32	4.17	4.28	4.32	4.29

## Sheet: Al soil
Al soil
T1	MM	2993	3783.5	3076	2919	2847.5
T1	HR	2813.5	3477	3270.5	2998	3055
T1	SC	2454	2789	4049.5	3317.5	3934.5
T2	MM	2533.5	3568	2818.5	1877.5	2977.5
T2	HR	3019.5	3438	2547	3120	3030
T2	SC	3784	2650	2308.5	2337.5	5730
T3	MM	5445	5655	4561.5	4877.5	4705.5
T3	HR	5705	5600	4244.5	7450	5470
T3	SC	7005	5520	5100	5300	5501.5
